# Supplementary material for: Facilitating Imaging Mass Spectrometry of Microbial Specialized Metabolites with METASPACE
Source: MDPI journal article supplement (doi:10.3390/metabo11080477), 2021-07-23

## Supplementary Information

Facilitating imaging mass spectrometry of microbial specialized metabolites with METASPACE.

Don D. Nguyen<sup>1</sup>, Veronika Saharuka<sup>1</sup>, Vitaly Kovalev<sup>1</sup>, Lachlan Stuart<sup>1</sup>, Massimo Del Prete<sup>2</sup>, Kinga M. Lubowiecka<sup>2</sup>, René De Mot<sup>3</sup>, Vittorio Venturi<sup>4</sup>, Theodore Alexandrov<sup>1, 5, 6, 7</sup>

- 1 Structural and Computational Biology Unit, European Molecular Biology Laboratory, Heidelberg, Germany
- 2 Photolab, European Molecular Biology Laboratory, Heidelberg, Germany
- 3 Centre of Microbial and Plant Genetics, KU Leuven, Leuven, Belgium
- 4 International Centre for Genetic Engineering and Biotechnology, Trieste, Italy
- 5 Metabolomics Core Facility, European Molecular Biology Laboratory, Heidelberg, Germany
- 6 Molecular Medicine Partnership Unit (MMPU), European Molecular Biology Laboratory, Heidelberg, Germany
- 7 Skaggs School of Pharmacy and Pharmaceutical Sciences, University of California San Diego, La Jolla, CA, USA

This file contains Supplementary Tables 1-4 and Supplementary Figures 1-2.

Supplementary Table S1. Bacterial strains used for evaluation of microbial imaging mass spectrometry (imaging MS) with METASPACE.

| Class                | Genus and species                         | Strain Number |
|----------------------|-------------------------------------------|---------------|
| Actinobacteria       | <i>Rhodococcus erythropolis</i>           | 43066         |
| Actinobacteria       | <i>Rhodococcus opacus</i>                 | 43205         |
| Actinobacteria       | <i>Streptomyces coelicolor</i>            | A2(3) / M145  |
| Actinobacteria       | <i>Streptomyces griseus subsp griseus</i> | 40236         |
| Actinobacteria       | <i>Streptomyces mobaraensis</i>           |               |
| Actinobacteria       | <i>Streptomyces lividans</i>              | PM66          |
| Actinobacteria       | <i>Streptomyces roseolilacinus</i>        | 40173         |
| Gamma Proteobacteria | <i>Pseudomonas savastanoi</i>             | 722           |
| Gamma Proteobacteria | <i>Pseudomonas putida</i>                 | RW10S2        |
| Bacilli              | <i>Bacillus subtilis BGA</i>              | 618           |

Supplementary Table S2. Number of metabolites and unique molecular formulas from the Natural Products Atlas (NPA) compared to the number METASPACE annotations at various FDR percentages, with and without off-sample filtering.

| Metabolites<br>in NPA | Unique molecular<br>formulas in NPA | Total number of METASPACE<br>annotations using NPA (FDR) |     |     |    |                      |     |     |    |
|-----------------------|-------------------------------------|----------------------------------------------------------|-----|-----|----|----------------------|-----|-----|----|
|                       |                                     | No filtering                                             |     |     |    | Off-sample filtering |     |     |    |
|                       |                                     | 50%                                                      | 20% | 10% | 5% | 50%                  | 20% | 10% | 5% |
| 5018                  | 3727                                | 1968                                                     | 95  | 29  | 18 | 1045                 | 64  | 20  | 12 |

Supplementary Table S3. Number of metabolites and unique molecular formulas from NPA after filtering for bacterial genus and species as compared to the number of unique molecular formulas annotated by METASPACE. Unique molecular formulas annotated by METASPACE are broken down by FDR 50% vs 20% and whether off-sample filtering was used.

| Genus               | species               | Metabolites<br>in NPA | Unique molecular<br>formulas in NPA | Unique molecular formulas annotated by METASPACE |                              |                      |                              | Curated<br>filtering |
|---------------------|-----------------------|-----------------------|-------------------------------------|--------------------------------------------------|------------------------------|----------------------|------------------------------|----------------------|
|                     |                       |                       |                                     | FDR 50%<br>no filter                             | FDR 50%<br>off-sample filter | FDR 20%<br>no filter | FDR 20%<br>off-sample filter |                      |
| <i>Bacillus</i>     | –                     | 389                   | 275                                 | 40                                               | 26                           | 2                    | 2                            | 9                    |
|                     | <i>subtilis</i>       | 101                   | 81                                  | 8                                                | 5                            | 2                    | 2                            | 9                    |
| <i>Pseudomonas</i>  | –                     | 266                   | 235                                 | 39                                               | 27                           | 2                    | 1                            | 10                   |
|                     | <i>putida</i>         | 3                     | 2                                   | 0                                                | 0                            | 0                    | 0                            | 9                    |
|                     | <i>savastanoi</i>     | 2                     | 2                                   | 0                                                | 0                            | 0                    | 0                            | 1                    |
| <i>Rhodococcus</i>  | –                     | 20                    | 16                                  | 4                                                | 1                            | 0                    | 0                            | 0                    |
|                     | <i>erythropolis</i>   | 3                     | 3                                   | 1                                                | 0                            | 0                    | 0                            | 0                    |
|                     | <i>opacus</i>         | 0                     | 0                                   | 0                                                | 0                            | 0                    | 0                            | 0                    |
| <i>Streptomyces</i> | –                     | 4343                  | 3201                                | 512                                              | 285                          | 30                   | 22                           | 34                   |
|                     | <i>coelicolor</i>     | 25                    | 23                                  | 8                                                | 7                            | 1                    | 1                            | 3                    |
|                     | <i>griseus</i>        | 106                   | 89                                  | 24                                               | 15                           | 0                    | 0                            | 3                    |
|                     | <i>lividans</i>       | 9                     | 9                                   | 2                                                | 1                            | 0                    | 0                            | 1                    |
|                     | <i>mobaraensis</i>    | 1                     | 1                                   | 0                                                | 0                            | 0                    | 0                            | 27                   |
|                     | <i>roseolilacinus</i> | 0                     | 0                                   | 0                                                | 0                            | 0                    | 0                            | 0                    |

Supplementary Table S4. 53 curated annotations from Figure 2 and Supplementary Figure 1 with direct URL to the annotation in METASPACE. Ordering is based on decreasing MSM score.

| FDR | MSM   | Formula      | Adduct | m/z      | Molecule Names                                                                                                                                                                                                                                                                                                                                                                                                                                                    |
|-----|-------|--------------|--------|----------|-------------------------------------------------------------------------------------------------------------------------------------------------------------------------------------------------------------------------------------------------------------------------------------------------------------------------------------------------------------------------------------------------------------------------------------------------------------------|
| 5%  | 0.974 | C54H95N9O16  | +Na    | 1148.679 | ['WLIP; Viscosin; Massetolide F', 'Massetolide F', 'Viscosin']<br><a href="https://metaspace2020.eu/annotations?db=NPA-2019-08&amp;ds=2020-01-07_11h15m21s&amp;mol=C54H95N9O16&amp;add=%2BNa&amp;fdr=0.5&amp;sections=3&amp;sort=formula">https://metaspace2020.eu/annotations?db=NPA-2019-08&amp;ds=2020-01-07_11h15m21s&amp;mol=C54H95N9O16&amp;add=%2BNa&amp;fdr=0.5&amp;sections=3&amp;sort=formula</a>                                                       |
| 5%  | 0.927 | C25H37NO4    | +H     | 416.2795 | ['Trichobotrysin C', 'Piericidin A1', 'Phomacin C', 'Trichobotrysin B']<br><a href="https://metaspace2020.eu/annotations?db=NPA-2019-08&amp;ds=2020-01-07_11h15m21s&amp;mol=C25H37NO4&amp;add=%2BH&amp;fdr=0.5&amp;sections=3&amp;sort=formula">https://metaspace2020.eu/annotations?db=NPA-2019-08&amp;ds=2020-01-07_11h15m21s&amp;mol=C25H37NO4&amp;add=%2BH&amp;fdr=0.5&amp;sections=3&amp;sort=formula</a>                                                    |
| 5%  | 0.902 | C51H80N12O14 | +Na    | 1107.581 | ['Iturin A-8', 'Mycosubtilin D', 'Iturin A9']<br><a href="https://metaspace2020.eu/annotations?db=NPA-2019-08&amp;ds=2020-01-07_11h15m21s&amp;mol=C51H80N12O14&amp;add=%2BNa&amp;fdr=0.5&amp;sections=3&amp;sort=formula">https://metaspace2020.eu/annotations?db=NPA-2019-08&amp;ds=2020-01-07_11h15m21s&amp;mol=C51H80N12O14&amp;add=%2BNa&amp;fdr=0.5&amp;sections=3&amp;sort=formula</a>                                                                      |
| 5%  | 0.872 | C54H95N9O16  | +K     | 1164.653 | ['WLIP; Viscosin; Massetolide F', 'Massetolide F', 'Viscosin']<br><a href="https://metaspace2020.eu/annotations?db=NPA-2019-08&amp;ds=2020-01-07_11h15m21s&amp;mol=C54H95N9O16&amp;add=%2BK&amp;fdr=0.5&amp;sections=3&amp;sort=formula">https://metaspace2020.eu/annotations?db=NPA-2019-08&amp;ds=2020-01-07_11h15m21s&amp;mol=C54H95N9O16&amp;add=%2BK&amp;fdr=0.5&amp;sections=3&amp;sort=formula</a>                                                         |
| 5%  | 0.848 | C51H80N12O14 | +K     | 1123.555 | ['Iturin A-8', 'Mycosubtilin D', 'Iturin A9']<br><a href="https://metaspace2020.eu/annotations?db=NPA-2019-08&amp;ds=2020-01-07_11h15m21s&amp;mol=C51H80N12O14&amp;add=%2BK&amp;fdr=0.5&amp;sections=3&amp;sort=formula">https://metaspace2020.eu/annotations?db=NPA-2019-08&amp;ds=2020-01-07_11h15m21s&amp;mol=C51H80N12O14&amp;add=%2BK&amp;fdr=0.5&amp;sections=3&amp;sort=formula</a>                                                                        |
| 20% | 0.777 | C25H37NO4    | +Na    | 438.2614 | ['Trichobotrysin C', 'Piericidin A1', 'Phomacin C', 'Trichobotrysin B']<br><a href="https://metaspace2020.eu/annotations?db=NPA-2019-08&amp;ds=2020-01-07_11h15m21s&amp;mol=C25H37NO4&amp;add=%2BNa&amp;fdr=0.5&amp;sections=3&amp;sort=formula">https://metaspace2020.eu/annotations?db=NPA-2019-08&amp;ds=2020-01-07_11h15m21s&amp;mol=C25H37NO4&amp;add=%2BNa&amp;fdr=0.5&amp;sections=3&amp;sort=formula</a>                                                  |
| 20% | 0.733 | C53H93N7O13  | +Na    | 1058.672 | ['[Ile7]-surfactin', 'Pumilacidin B', 'Leu7-Surfactin', 'Not named', 'Not named', 'Not named', 'Gageopeptin A']<br><a href="https://metaspace2020.eu/annotations?db=NPA-2019-08&amp;ds=2020-01-07_11h15m21s&amp;mol=C53H93N7O13&amp;add=%2BNa&amp;fdr=0.5&amp;sections=3&amp;sort=formula">https://metaspace2020.eu/annotations?db=NPA-2019-08&amp;ds=2020-01-07_11h15m21s&amp;mol=C53H93N7O13&amp;add=%2BNa&amp;fdr=0.5&amp;sections=3&amp;sort=formula</a>      |
| 50% | 0.729 | C53H93N9O16  | +K     | 1150.637 | ['Massetolide E', 'Massetolide E']<br><a href="https://metaspace2020.eu/annotations?db=NPA-2019-08&amp;ds=2020-01-07_11h15m21s&amp;mol=C53H93N9O16&amp;add=%2BK&amp;fdr=0.5&amp;sections=3&amp;sort=formula">https://metaspace2020.eu/annotations?db=NPA-2019-08&amp;ds=2020-01-07_11h15m21s&amp;mol=C53H93N9O16&amp;add=%2BK&amp;fdr=0.5&amp;sections=3&amp;sort=formula</a>                                                                                     |
| 50% | 0.717 | C25H37NO4    | +K     | 454.2354 | ['Trichobotrysin C', 'Piericidin A1', 'Phomacin C', 'Trichobotrysin B']<br><a href="https://metaspace2020.eu/annotations?db=NPA-2019-08&amp;ds=2020-01-07_11h15m21s&amp;mol=C25H37NO4&amp;add=%2BK&amp;fdr=0.5&amp;sections=3&amp;sort=formula">https://metaspace2020.eu/annotations?db=NPA-2019-08&amp;ds=2020-01-07_11h15m21s&amp;mol=C25H37NO4&amp;add=%2BK&amp;fdr=0.5&amp;sections=3&amp;sort=formula</a>                                                    |
| 50% | 0.619 | C53H93N7O13  | +K     | 1074.646 | ['[Ile7]-surfactin', 'Pumilacidin B', 'Leu7-Surfactin', 'Not named', 'Not named', 'Not named', 'Gageopeptin A']<br><a href="https://metaspace2020.eu/annotations?db=NPA-2019-08&amp;ds=2020-01-07_11h15m21s&amp;mol=C53H93N7O13&amp;add=%2BK&amp;fdr=0.5&amp;sections=3&amp;sort=formula">https://metaspace2020.eu/annotations?db=NPA-2019-08&amp;ds=2020-01-07_11h15m21s&amp;mol=C53H93N7O13&amp;add=%2BK&amp;fdr=0.5&amp;sections=3&amp;sort=formula</a>        |
| 50% | 0.611 | C25H33N3O    | +H     | 392.2696 | ['Butylcyclohexylprodigiosin', 'Metacycloprodigiosin', 'Methyl-cyclodecylprodiginine', 'Propyl-metacyclooctylprodiginine']<br><a href="https://metaspace2020.eu/annotations?db=NPA-2019-08&amp;ds=2020-01-07_11h15m21s&amp;mol=C25H33N3O&amp;add=%2BH&amp;fdr=0.5&amp;sections=3&amp;sort=formula">https://metaspace2020.eu/annotations?db=NPA-2019-08&amp;ds=2020-01-07_11h15m21s&amp;mol=C25H33N3O&amp;add=%2BH&amp;fdr=0.5&amp;sections=3&amp;sort=formula</a> |
| 50% | 0.594 | C25H35N3O    | +H     | 394.2852 | ['Undecylprodigiosin', 'Prodigiosin 25-C']<br><a href="https://metaspace2020.eu/annotations?db=NPA-2019-08&amp;ds=2020-01-07_11h15m21s&amp;mol=C25H35N3O&amp;add=%2BH&amp;fdr=0.5&amp;sections=3&amp;sort=formula">https://metaspace2020.eu/annotations?db=NPA-2019-08&amp;ds=2020-01-07_11h15m21s&amp;mol=C25H35N3O&amp;add=%2BH&amp;fdr=0.5&amp;sections=3&amp;sort=formula</a>                                                                                 |



Supplementary Table S4 continued.

| <b>FDR</b> | <b>MSM</b> | <b>Formula</b>                                                 | <b>Adduct</b> | <b>m/z</b> | <b>Molecule Names</b>                                                                                                                                                                                                                                                                                                                                                                                                                               |
|------------|------------|----------------------------------------------------------------|---------------|------------|-----------------------------------------------------------------------------------------------------------------------------------------------------------------------------------------------------------------------------------------------------------------------------------------------------------------------------------------------------------------------------------------------------------------------------------------------------|
| 50%        | 0.541      | C <sub>14</sub> H <sub>19</sub> NO <sub>4</sub>                | +H            | 266.1386   | ['3097-B2', 'Salinosporamide D', 'Fuzanin B', 'Fuzanin H', 'Salinosporamide G', 'Fuzanin A', 'Anisomycin']<br><a href="https://metaspace2020.eu/annotations?db=NPA-2019-08&amp;ds=2020-01-07_11h15m21s&amp;mol=C14H19NO4&amp;add=%2BH&amp;fdr=0.5&amp;sections=3&amp;sort=formula">https://metaspace2020.eu/annotations?db=NPA-2019-08&amp;ds=2020-01-07_11h15m21s&amp;mol=C14H19NO4&amp;add=%2BH&amp;fdr=0.5&amp;sections=3&amp;sort=formula</a>   |
| 20%        | 0.459      | C <sub>53</sub> H <sub>93</sub> N <sub>9</sub> O <sub>16</sub> | +Na           | 1134.663   | ['Massetolide E', 'Massetolide E']<br><a href="https://metaspace2020.eu/annotations?db=NPA-2019-08&amp;ds=2020-01-07_11h15m21s&amp;mol=C53H93N9O16&amp;add=%2BNa&amp;fdr=0.5&amp;sections=3&amp;sort=formula">https://metaspace2020.eu/annotations?db=NPA-2019-08&amp;ds=2020-01-07_11h15m21s&amp;mol=C53H93N9O16&amp;add=%2BNa&amp;fdr=0.5&amp;sections=3&amp;sort=formula</a>                                                                     |
| 50%        | 0.438      | C <sub>28</sub> H <sub>36</sub> N <sub>4</sub> O <sub>6</sub>  | +Na           | 547.2527   | ['Safracin A']<br><a href="https://metaspace2020.eu/annotations?db=NPA-2019-08&amp;ds=2020-01-07_11h15m21s&amp;mol=C28H36N4O6&amp;add=%2BNa&amp;fdr=0.5&amp;sections=3&amp;sort=formula">https://metaspace2020.eu/annotations?db=NPA-2019-08&amp;ds=2020-01-07_11h15m21s&amp;mol=C28H36N4O6&amp;add=%2BNa&amp;fdr=0.5&amp;sections=3&amp;sort=formula</a>                                                                                           |
| 50%        | 0.277      | C <sub>14</sub> H <sub>19</sub> NO <sub>4</sub>                | +Na           | 288.1206   | ['3097-B2', 'Salinosporamide D', 'Fuzanin B', 'Fuzanin H', 'Salinosporamide G', 'Fuzanin A', 'Anisomycin']<br><a href="https://metaspace2020.eu/annotations?db=NPA-2019-08&amp;ds=2020-01-07_11h15m21s&amp;mol=C14H19NO4&amp;add=%2BNa&amp;fdr=0.5&amp;sections=3&amp;sort=formula">https://metaspace2020.eu/annotations?db=NPA-2019-08&amp;ds=2020-01-07_11h15m21s&amp;mol=C14H19NO4&amp;add=%2BNa&amp;fdr=0.5&amp;sections=3&amp;sort=formula</a> |
| 50%        | 0.188      | C <sub>14</sub> H <sub>19</sub> NO <sub>4</sub>                | +K            | 304.0945   | ['3097-B2', 'Salinosporamide D', 'Fuzanin B', 'Fuzanin H', 'Salinosporamide G', 'Fuzanin A', 'Anisomycin']<br><a href="https://metaspace2020.eu/annotations?db=NPA-2019-08&amp;ds=2020-01-07_11h15m21s&amp;mol=C14H19NO4&amp;add=%2BK&amp;fdr=0.5&amp;sections=3&amp;sort=formula">https://metaspace2020.eu/annotations?db=NPA-2019-08&amp;ds=2020-01-07_11h15m21s&amp;mol=C14H19NO4&amp;add=%2BK&amp;fdr=0.5&amp;sections=3&amp;sort=formula</a>   |
| 50%        | 0.185      | C <sub>18</sub> H <sub>36</sub> N <sub>6</sub> O <sub>5</sub>  | +H            | 417.282    | ['2"-N-formimidoylistamycin B"]<br><a href="https://metaspace2020.eu/annotations?db=NPA-2019-08&amp;ds=2020-01-07_11h15m21s&amp;mol=C18H36N6O5&amp;add=%2BH&amp;fdr=0.5&amp;sections=3&amp;sort=formula">https://metaspace2020.eu/annotations?db=NPA-2019-08&amp;ds=2020-01-07_11h15m21s&amp;mol=C18H36N6O5&amp;add=%2BH&amp;fdr=0.5&amp;sections=3&amp;sort=formula</a>                                                                            |
| 50%        | 0.169      | C <sub>54</sub> H <sub>95</sub> N <sub>9</sub> O <sub>16</sub> | +H            | 1126.697   | ['WLIP; Viscosin; Massetolide F', 'Massetolide F', 'Viscosin']<br><a href="https://metaspace2020.eu/annotations?db=NPA-2019-08&amp;ds=2020-01-07_11h15m21s&amp;mol=C54H95N9O16&amp;add=%2BH&amp;fdr=0.5&amp;sections=3&amp;sort=formula">https://metaspace2020.eu/annotations?db=NPA-2019-08&amp;ds=2020-01-07_11h15m21s&amp;mol=C54H95N9O16&amp;add=%2BH&amp;fdr=0.5&amp;sections=3&amp;sort=formula</a>                                           |
| 50%        | 0.14       | C <sub>56</sub> H <sub>99</sub> N <sub>9</sub> O <sub>16</sub> | +Na           | 1176.71    | ['Massetolide B/H', 'Massetolide H', 'Massetolide B']<br><a href="https://metaspace2020.eu/annotations?db=NPA-2019-08&amp;ds=2020-01-07_11h15m21s&amp;mol=C56H99N9O16&amp;add=%2BNa&amp;fdr=0.5&amp;sections=3&amp;sort=formula">https://metaspace2020.eu/annotations?db=NPA-2019-08&amp;ds=2020-01-07_11h15m21s&amp;mol=C56H99N9O16&amp;add=%2BNa&amp;fdr=0.5&amp;sections=3&amp;sort=formula</a>                                                  |
| 50%        | 0.135      | C <sub>25</sub> H <sub>37</sub> NO <sub>3</sub>                | +Na           | 422.2665   | ['Trichobotrysin D', 'Piericidin F']<br><a href="https://metaspace2020.eu/annotations?db=NPA-2019-08&amp;ds=2020-01-07_11h15m21s&amp;mol=C25H37NO3&amp;add=%2BNa&amp;fdr=0.5&amp;sections=3&amp;sort=formula">https://metaspace2020.eu/annotations?db=NPA-2019-08&amp;ds=2020-01-07_11h15m21s&amp;mol=C25H37NO3&amp;add=%2BNa&amp;fdr=0.5&amp;sections=3&amp;sort=formula</a>                                                                       |
| 50%        | 0.126      | C <sub>25</sub> H <sub>37</sub> NO <sub>3</sub>                | +H            | 400.2846   | ['Trichobotrysin D', 'Piericidin F']<br><a href="https://metaspace2020.eu/annotations?db=NPA-2019-08&amp;ds=2020-01-07_11h15m21s&amp;mol=C25H37NO3&amp;add=%2BH&amp;fdr=0.5&amp;sections=3&amp;sort=formula">https://metaspace2020.eu/annotations?db=NPA-2019-08&amp;ds=2020-01-07_11h15m21s&amp;mol=C25H37NO3&amp;add=%2BH&amp;fdr=0.5&amp;sections=3&amp;sort=formula</a>                                                                         |
| 50%        | 0.125      | C <sub>34</sub> H <sub>46</sub> N <sub>2</sub> O <sub>8</sub>  | +K            | 649.2885   | ['UCF-116-C', 'Ansatrienin A3', 'Ansatrienin A2']<br><a href="https://metaspace2020.eu/annotations?db=NPA-2019-08&amp;ds=2020-01-07_11h15m21s&amp;mol=C34H46N2O8&amp;add=%2BK&amp;fdr=0.5&amp;sections=3&amp;sort=formula">https://metaspace2020.eu/annotations?db=NPA-2019-08&amp;ds=2020-01-07_11h15m21s&amp;mol=C34H46N2O8&amp;add=%2BK&amp;fdr=0.5&amp;sections=3&amp;sort=formula</a>                                                          |
| 50%        | 0.124      | C <sub>20</sub> H <sub>27</sub> NO <sub>4</sub>                | +H            | 346.2012   | ['Radiospene J', '(2E)-11-(4'-aminophenyl)-5,9-O-cyclo-4,6,8-trimethyl-11-oxo-undec-2-enoic acid"]<br><a href="https://metaspace2020.eu/annotations?db=NPA-2019-08&amp;ds=2020-01-07_11h15m21s&amp;mol=C20H27NO4&amp;add=%2BH&amp;fdr=0.5&amp;sections=3&amp;sort=formula">https://metaspace2020.eu/annotations?db=NPA-2019-08&amp;ds=2020-01-07_11h15m21s&amp;mol=C20H27NO4&amp;add=%2BH&amp;fdr=0.5&amp;sections=3&amp;sort=formula</a>           |

Supplementary Table S4 continued.

| <b>FDR</b>                                                                                                                                                                                                                                                                                                                                  | <b>MSM</b> | <b>Formula</b> | <b>Adduct</b> | <b>m/z</b> | <b>Molecule Names</b>                                                                                                                                  |
|---------------------------------------------------------------------------------------------------------------------------------------------------------------------------------------------------------------------------------------------------------------------------------------------------------------------------------------------|------------|----------------|---------------|------------|--------------------------------------------------------------------------------------------------------------------------------------------------------|
| 50%                                                                                                                                                                                                                                                                                                                                         | 0.122      | C52H91N7O13    | +Na           | 1044.657   | ['Not named', '[Ile4]Surfactin', '[Leu4]Surfactin', 'Not named', '[Leu-7]surfactin', '[Ile2,4,7]Surfactin', 'Not named', 'Surfactin', 'Gageopeptin B'] |
| <a href="https://metaspace2020.eu/annotations?db=NPA-2019-08&amp;ds=2020-01-07_11h15m21s&amp;mol=C52H91N7O13&amp;add=%2BNa&amp;fdr=0.5&amp;sections=3&amp;sort=formula">https://metaspace2020.eu/annotations?db=NPA-2019-08&amp;ds=2020-01-07_11h15m21s&amp;mol=C52H91N7O13&amp;add=%2BNa&amp;fdr=0.5&amp;sections=3&amp;sort=formula</a>   |            |                |               |            |                                                                                                                                                        |
| 50%                                                                                                                                                                                                                                                                                                                                         | 0.121      | C56H99N9O16    | +K            | 1192.684   | ['Massetolide B/H', 'Massetolide H', 'Massetolide B']                                                                                                  |
| <a href="https://metaspace2020.eu/annotations?db=NPA-2019-08&amp;ds=2020-01-07_11h15m21s&amp;mol=C56H99N9O16&amp;add=%2BK&amp;fdr=0.5&amp;sections=3&amp;sort=formula">https://metaspace2020.eu/annotations?db=NPA-2019-08&amp;ds=2020-01-07_11h15m21s&amp;mol=C56H99N9O16&amp;add=%2BK&amp;fdr=0.5&amp;sections=3&amp;sort=formula</a>     |            |                |               |            |                                                                                                                                                        |
| 50%                                                                                                                                                                                                                                                                                                                                         | 0.119      | C10H13NO4      | +H            | 212.0917   | ['Farinomalein', 'N-salicyloyl-2-aminopropan-1,3-diol', 'Pestalactam B', '2,5-Dihydroxy-4-methoxymethyl-acetanilide', 'Makomotine D', 'CJ-14,877']     |
| <a href="https://metaspace2020.eu/annotations?db=NPA-2019-08&amp;ds=2020-01-07_11h15m21s&amp;mol=C10H13NO4&amp;add=%2BH&amp;fdr=0.5&amp;sections=3&amp;sort=formula">https://metaspace2020.eu/annotations?db=NPA-2019-08&amp;ds=2020-01-07_11h15m21s&amp;mol=C10H13NO4&amp;add=%2BH&amp;fdr=0.5&amp;sections=3&amp;sort=formula</a>         |            |                |               |            |                                                                                                                                                        |
| 50%                                                                                                                                                                                                                                                                                                                                         | 0.118      | C40H70O8       | +K            | 717.4702   | ['Campechic acid A']                                                                                                                                   |
| <a href="https://metaspace2020.eu/annotations?db=NPA-2019-08&amp;ds=2020-01-07_11h15m21s&amp;mol=C40H70O8&amp;add=%2BK&amp;fdr=0.5&amp;sections=3&amp;sort=formula">https://metaspace2020.eu/annotations?db=NPA-2019-08&amp;ds=2020-01-07_11h15m21s&amp;mol=C40H70O8&amp;add=%2BK&amp;fdr=0.5&amp;sections=3&amp;sort=formula</a>           |            |                |               |            |                                                                                                                                                        |
| 50%                                                                                                                                                                                                                                                                                                                                         | 0.118      | C55H97N9O16    | +Na           | 1162.695   | ['Pseudophomin A; Massetolide A/D/G', 'Massetolide A', 'Massetolide D', 'Massetolide G', 'Pseudophomin A']                                             |
| <a href="https://metaspace2020.eu/annotations?db=NPA-2019-08&amp;ds=2020-01-07_11h15m21s&amp;mol=C55H97N9O16&amp;add=%2BNa&amp;fdr=0.5&amp;sections=3&amp;sort=formula">https://metaspace2020.eu/annotations?db=NPA-2019-08&amp;ds=2020-01-07_11h15m21s&amp;mol=C55H97N9O16&amp;add=%2BNa&amp;fdr=0.5&amp;sections=3&amp;sort=formula</a>   |            |                |               |            |                                                                                                                                                        |
| 50%                                                                                                                                                                                                                                                                                                                                         | 0.113      | C27H35NO4      | +H            | 438.2638   | ['Heronamide D']                                                                                                                                       |
| <a href="https://metaspace2020.eu/annotations?db=NPA-2019-08&amp;ds=2020-01-07_11h15m21s&amp;mol=C27H35NO4&amp;add=%2BH&amp;fdr=0.5&amp;sections=3&amp;sort=formula">https://metaspace2020.eu/annotations?db=NPA-2019-08&amp;ds=2020-01-07_11h15m21s&amp;mol=C27H35NO4&amp;add=%2BH&amp;fdr=0.5&amp;sections=3&amp;sort=formula</a>         |            |                |               |            |                                                                                                                                                        |
| 50%                                                                                                                                                                                                                                                                                                                                         | 0.111      | C55H97N9O16    | +K            | 1178.668   | ['Pseudophomin A; Massetolide A/D/G', 'Massetolide A', 'Massetolide D', 'Massetolide G', 'Pseudophomin A']                                             |
| <a href="https://metaspace2020.eu/annotations?db=NPA-2019-08&amp;ds=2020-01-07_11h15m21s&amp;mol=C55H97N9O16&amp;add=%2BK&amp;fdr=0.5&amp;sections=3&amp;sort=formula">https://metaspace2020.eu/annotations?db=NPA-2019-08&amp;ds=2020-01-07_11h15m21s&amp;mol=C55H97N9O16&amp;add=%2BK&amp;fdr=0.5&amp;sections=3&amp;sort=formula</a>     |            |                |               |            |                                                                                                                                                        |
| 50%                                                                                                                                                                                                                                                                                                                                         | 0.106      | C24H35NO3      | +Na           | 408.2509   | ['Ascosalipyrrolidinone B', 'TMC-169', 'Mer-A2026B']                                                                                                   |
| <a href="https://metaspace2020.eu/annotations?db=NPA-2019-08&amp;ds=2020-01-07_11h15m21s&amp;mol=C24H35NO3&amp;add=%2BNa&amp;fdr=0.5&amp;sections=3&amp;sort=formula">https://metaspace2020.eu/annotations?db=NPA-2019-08&amp;ds=2020-01-07_11h15m21s&amp;mol=C24H35NO3&amp;add=%2BNa&amp;fdr=0.5&amp;sections=3&amp;sort=formula</a>       |            |                |               |            |                                                                                                                                                        |
| 50%                                                                                                                                                                                                                                                                                                                                         | 0.097      | C50H78N12O14   | +Na           | 1093.565   | ['Iturin A-7', 'Iturin A6']                                                                                                                            |
| <a href="https://metaspace2020.eu/annotations?db=NPA-2019-08&amp;ds=2020-01-07_11h15m21s&amp;mol=C50H78N12O14&amp;add=%2BNa&amp;fdr=0.5&amp;sections=3&amp;sort=formula">https://metaspace2020.eu/annotations?db=NPA-2019-08&amp;ds=2020-01-07_11h15m21s&amp;mol=C50H78N12O14&amp;add=%2BNa&amp;fdr=0.5&amp;sections=3&amp;sort=formula</a> |            |                |               |            |                                                                                                                                                        |
| 50%                                                                                                                                                                                                                                                                                                                                         | 0.093      | C13H16N2O3     | +H            | 249.1233   | ['Salinazinone B', 'Abbeymycin', 'Spinnoxazine B']                                                                                                     |
| <a href="https://metaspace2020.eu/annotations?db=NPA-2019-08&amp;ds=2020-01-07_11h15m21s&amp;mol=C13H16N2O3&amp;add=%2BH&amp;fdr=0.5&amp;sections=3&amp;sort=formula">https://metaspace2020.eu/annotations?db=NPA-2019-08&amp;ds=2020-01-07_11h15m21s&amp;mol=C13H16N2O3&amp;add=%2BH&amp;fdr=0.5&amp;sections=3&amp;sort=formula</a>       |            |                |               |            |                                                                                                                                                        |
| 50%                                                                                                                                                                                                                                                                                                                                         | 0.089      | C24H35NO3      | +H            | 386.2689   | ['Ascosalipyrrolidinone B', 'TMC-169', 'Mer-A2026B']                                                                                                   |
| <a href="https://metaspace2020.eu/annotations?db=NPA-2019-08&amp;ds=2020-01-07_11h15m21s&amp;mol=C24H35NO3&amp;add=%2BH&amp;fdr=0.5&amp;sections=3&amp;sort=formula">https://metaspace2020.eu/annotations?db=NPA-2019-08&amp;ds=2020-01-07_11h15m21s&amp;mol=C24H35NO3&amp;add=%2BH&amp;fdr=0.5&amp;sections=3&amp;sort=formula</a>         |            |                |               |            |                                                                                                                                                        |
| 50%                                                                                                                                                                                                                                                                                                                                         | 0.087      | C43H51NO16     | +K            | 876.2839   | ['Sulfurmycin B']                                                                                                                                      |
| <a href="https://metaspace2020.eu/annotations?db=NPA-2019-08&amp;ds=2020-01-07_11h15m21s&amp;mol=C43H51NO16&amp;add=%2BK&amp;fdr=0.5&amp;sections=3&amp;sort=formula">https://metaspace2020.eu/annotations?db=NPA-2019-08&amp;ds=2020-01-07_11h15m21s&amp;mol=C43H51NO16&amp;add=%2BK&amp;fdr=0.5&amp;sections=3&amp;sort=formula</a>       |            |                |               |            |                                                                                                                                                        |

Supplementary Table S4 continued.

| <b>FDR</b> | <b>MSM</b> | <b>Formula</b> | <b>Adduct</b> | <b>m/z</b> | <b>Molecule Names</b>                                                                                                                                                                                                                                                                                                                                                                                                                                                                                                            |
|------------|------------|----------------|---------------|------------|----------------------------------------------------------------------------------------------------------------------------------------------------------------------------------------------------------------------------------------------------------------------------------------------------------------------------------------------------------------------------------------------------------------------------------------------------------------------------------------------------------------------------------|
| 50%        | 0.079      | C24H35NO4      | +Na           | 424.2458   | ['Aspochalasin J', 'SN-I98-D', 'L-755807', 'Gymnastatin H', 'Aspergillin PZ', 'Aspochalasin P', 'Aspochalasin D', 'Trichalasin H', 'Aspochalasin M', 'Aspochalasin S', 'Piericidin E1']<br><a href="https://metaspace2020.eu/annotations?db=NPA-2019-08&amp;ds=2020-01-07_11h15m21s&amp;mol=C24H35NO4&amp;add=%2BNa&amp;fdr=0.5&amp;sections=3&amp;sort=formula">https://metaspace2020.eu/annotations?db=NPA-2019-08&amp;ds=2020-01-07_11h15m21s&amp;mol=C24H35NO4&amp;add=%2BNa&amp;fdr=0.5&amp;sections=3&amp;sort=formula</a> |
| 50%        | 0.079      | C24H35NO3      | +K            | 424.2248   | ['Ascosalipyrrolidinone B', 'TMC-169', 'Mer-A2026B']<br><a href="https://metaspace2020.eu/annotations?db=NPA-2019-08&amp;ds=2020-01-07_11h15m21s&amp;mol=C24H35NO3&amp;add=%2BK&amp;fdr=0.5&amp;sections=3&amp;sort=formula">https://metaspace2020.eu/annotations?db=NPA-2019-08&amp;ds=2020-01-07_11h15m21s&amp;mol=C24H35NO3&amp;add=%2BK&amp;fdr=0.5&amp;sections=3&amp;sort=formula</a>                                                                                                                                      |
| 50%        | 0.071      | C23H33NO5      | +H            | 404.2431   | ['Salternamide B', 'Neopestalotin C', '12'-hydroxy gymnastatin N', 'Chartarutine A']<br><a href="https://metaspace2020.eu/annotations?db=NPA-2019-08&amp;ds=2020-01-07_11h15m21s&amp;mol=C23H33NO5&amp;add=%2BH&amp;fdr=0.5&amp;sections=3&amp;sort=formula">https://metaspace2020.eu/annotations?db=NPA-2019-08&amp;ds=2020-01-07_11h15m21s&amp;mol=C23H33NO5&amp;add=%2BH&amp;fdr=0.5&amp;sections=3&amp;sort=formula</a>                                                                                                      |
| 50%        | 0.064      | C23H33NO5      | +Na           | 426.2251   | ['Salternamide B', 'Neopestalotin C', '12'-hydroxy gymnastatin N', 'Chartarutine A']<br><a href="https://metaspace2020.eu/annotations?db=NPA-2019-08&amp;ds=2020-01-07_11h15m21s&amp;mol=C23H33NO5&amp;add=%2BNa&amp;fdr=0.5&amp;sections=3&amp;sort=formula">https://metaspace2020.eu/annotations?db=NPA-2019-08&amp;ds=2020-01-07_11h15m21s&amp;mol=C23H33NO5&amp;add=%2BNa&amp;fdr=0.5&amp;sections=3&amp;sort=formula</a>                                                                                                    |
| 50%        | 0.063      | C20H29NO5      | +H            | 364.2118   | ['(2E)-11-(4-aminophenyl)-5,9-dihydroxy-4,6,8-trimethyl-11-oxo-undec-2-enoic acid']<br><a href="https://metaspace2020.eu/annotations?db=NPA-2019-08&amp;ds=2020-01-07_11h15m21s&amp;mol=C20H29NO5&amp;add=%2BH&amp;fdr=0.5&amp;sections=3&amp;sort=formula">https://metaspace2020.eu/annotations?db=NPA-2019-08&amp;ds=2020-01-07_11h15m21s&amp;mol=C20H29NO5&amp;add=%2BH&amp;fdr=0.5&amp;sections=3&amp;sort=formula</a>                                                                                                       |
| 50%        | 0.062      | C18H36N6O5     | +K            | 455.2378   | ['2"-N-formimidoylistamycin B']<br><a href="https://metaspace2020.eu/annotations?db=NPA-2019-08&amp;ds=2020-01-07_11h15m21s&amp;mol=C18H36N6O5&amp;add=%2BK&amp;fdr=0.5&amp;sections=3&amp;sort=formula">https://metaspace2020.eu/annotations?db=NPA-2019-08&amp;ds=2020-01-07_11h15m21s&amp;mol=C18H36N6O5&amp;add=%2BK&amp;fdr=0.5&amp;sections=3&amp;sort=formula</a>                                                                                                                                                         |
| 50%        | 0.059      | C26H39NO3      | +Na           | 436.2822   | ['Termitomycamide A', 'Trichobotrysin E', 'Myceliothermophin B', 'Myceliothermophin A', 'Mer-A2026A']<br><a href="https://metaspace2020.eu/annotations?db=NPA-2019-08&amp;ds=2020-01-07_11h15m21s&amp;mol=C26H39NO3&amp;add=%2BNa&amp;fdr=0.5&amp;sections=3&amp;sort=formula">https://metaspace2020.eu/annotations?db=NPA-2019-08&amp;ds=2020-01-07_11h15m21s&amp;mol=C26H39NO3&amp;add=%2BNa&amp;fdr=0.5&amp;sections=3&amp;sort=formula</a>                                                                                   |
| 50%        | 0.057      | C29H54N10O12   | +Na           | 757.3814   | ['Tsukubachelin B']<br><a href="https://metaspace2020.eu/annotations?db=NPA-2019-08&amp;ds=2020-01-07_11h15m21s&amp;mol=C29H54N10O12&amp;add=%2BNa&amp;fdr=0.5&amp;sections=3&amp;sort=formula">https://metaspace2020.eu/annotations?db=NPA-2019-08&amp;ds=2020-01-07_11h15m21s&amp;mol=C29H54N10O12&amp;add=%2BNa&amp;fdr=0.5&amp;sections=3&amp;sort=formula</a>                                                                                                                                                               |
| 50%        | 0.057      | C50H77N11O15   | +Na           | 1094.549   | ['Iturin C3']<br><a href="https://metaspace2020.eu/annotations?db=NPA-2019-08&amp;ds=2020-01-07_11h15m21s&amp;mol=C50H77N11O15&amp;add=%2BNa&amp;fdr=0.5&amp;sections=3&amp;sort=formula">https://metaspace2020.eu/annotations?db=NPA-2019-08&amp;ds=2020-01-07_11h15m21s&amp;mol=C50H77N11O15&amp;add=%2BNa&amp;fdr=0.5&amp;sections=3&amp;sort=formula</a>                                                                                                                                                                     |
| 50%        | 0.055      | C25H37NO3      | +K            | 438.2405   | ['Trichobotrysin D', 'Piericidin F']<br><a href="https://metaspace2020.eu/annotations?db=NPA-2019-08&amp;ds=2020-01-07_11h15m21s&amp;mol=C25H37NO3&amp;add=%2BK&amp;fdr=0.5&amp;sections=3&amp;sort=formula">https://metaspace2020.eu/annotations?db=NPA-2019-08&amp;ds=2020-01-07_11h15m21s&amp;mol=C25H37NO3&amp;add=%2BK&amp;fdr=0.5&amp;sections=3&amp;sort=formula</a>                                                                                                                                                      |
| 50%        | 0.036      | C50H78N12O14   | +K            | 1109.539   | ['Iturin A-7', 'Iturin A6']<br><a href="https://metaspace2020.eu/annotations?db=NPA-2019-08&amp;ds=2020-01-07_11h15m21s&amp;mol=C50H78N12O14&amp;add=%2BK&amp;fdr=0.5&amp;sections=3&amp;sort=formula">https://metaspace2020.eu/annotations?db=NPA-2019-08&amp;ds=2020-01-07_11h15m21s&amp;mol=C50H78N12O14&amp;add=%2BK&amp;fdr=0.5&amp;sections=3&amp;sort=formula</a>                                                                                                                                                         |
| 50%        | 0.028      | C52H91N7O13    | +K            | 1060.631   | ['Not named', '[Ile4]Surfactin', '[Leu4]Surfactin', 'Not named', '[Leu-7]surfactin', '[Ile2,4,7]Surfactin', 'Not named', 'Surfactin', 'Gageopeptin B']<br><a href="https://metaspace2020.eu/annotations?db=NPA-2019-08&amp;ds=2020-01-07_11h15m21s&amp;mol=C52H91N7O13&amp;add=%2BK&amp;fdr=0.5&amp;sections=3&amp;sort=formula">https://metaspace2020.eu/annotations?db=NPA-2019-08&amp;ds=2020-01-07_11h15m21s&amp;mol=C52H91N7O13&amp;add=%2BK&amp;fdr=0.5&amp;sections=3&amp;sort=formula</a>                                |

Supplementary Table S4 continued.

| <b>FDR</b> | <b>MSM</b> | <b>Formula</b> | <b>Adduct</b> | <b>m/z</b> | <b>Molecule Names</b>                                                                                                                                                                                                                                                                                                                                                                                                                       |
|------------|------------|----------------|---------------|------------|---------------------------------------------------------------------------------------------------------------------------------------------------------------------------------------------------------------------------------------------------------------------------------------------------------------------------------------------------------------------------------------------------------------------------------------------|
| 50%        | 0.025      | C47H78O14      | +Na           | 889.5283   | ['Endusamycin']<br><a href="https://metaspace2020.eu/annotations?db=NPA-2019-08&amp;ds=2020-01-07_11h15m21s&amp;mol=C47H78O14&amp;add=%2BNa&amp;fdr=0.5&amp;sections=3&amp;sort=formula">https://metaspace2020.eu/annotations?db=NPA-2019-08&amp;ds=2020-01-07_11h15m21s&amp;mol=C47H78O14&amp;add=%2BNa&amp;fdr=0.5&amp;sections=3&amp;sort=formula</a>                                                                                    |
| 50%        | 0.022      | C23H42O7       | +K            | 469.2562   | ['8-Deoxylankolide']<br><a href="https://metaspace2020.eu/annotations?db=NPA-2019-08&amp;ds=2020-01-07_11h15m21s&amp;mol=C23H42O7&amp;add=%2BK&amp;fdr=0.5&amp;sections=3&amp;sort=formula">https://metaspace2020.eu/annotations?db=NPA-2019-08&amp;ds=2020-01-07_11h15m21s&amp;mol=C23H42O7&amp;add=%2BK&amp;fdr=0.5&amp;sections=3&amp;sort=formula</a>                                                                                   |
| 50%        | 0.02       | C20H27NO4      | +Na           | 368.1832   | ['Radiaspene J', "(2E)-11-(4'-aminophenyl)-5,9-O-cyclo-4,6,8-trimethyl-11-oxo-undec-2-enoic acid"]<br><a href="https://metaspace2020.eu/annotations?db=NPA-2019-08&amp;ds=2020-01-07_11h15m21s&amp;mol=C20H27NO4&amp;add=%2BNa&amp;fdr=0.5&amp;sections=3&amp;sort=formula">https://metaspace2020.eu/annotations?db=NPA-2019-08&amp;ds=2020-01-07_11h15m21s&amp;mol=C20H27NO4&amp;add=%2BNa&amp;fdr=0.5&amp;sections=3&amp;sort=formula</a> |
| 50%        | 0.013      | C17H29N7O8     | +K            | 498.1709   | ['Glycinothricin']<br><a href="https://metaspace2020.eu/annotations?db=NPA-2019-08&amp;ds=2020-01-07_11h15m21s&amp;mol=C17H29N7O8&amp;add=%2BK&amp;fdr=0.5&amp;sections=3&amp;sort=formula">https://metaspace2020.eu/annotations?db=NPA-2019-08&amp;ds=2020-01-07_11h15m21s&amp;mol=C17H29N7O8&amp;add=%2BK&amp;fdr=0.5&amp;sections=3&amp;sort=formula</a>                                                                                 |
| 50%        | 0.013      | C20H27NO4      | +K            | 384.1571   | ['Radiaspene J', "(2E)-11-(4'-aminophenyl)-5,9-O-cyclo-4,6,8-trimethyl-11-oxo-undec-2-enoic acid"]<br><a href="https://metaspace2020.eu/annotations?db=NPA-2019-08&amp;ds=2020-01-07_11h15m21s&amp;mol=C20H27NO4&amp;add=%2BK&amp;fdr=0.5&amp;sections=3&amp;sort=formula">https://metaspace2020.eu/annotations?db=NPA-2019-08&amp;ds=2020-01-07_11h15m21s&amp;mol=C20H27NO4&amp;add=%2BK&amp;fdr=0.5&amp;sections=3&amp;sort=formula</a>   |

Supplementary Figure S1. Imaging MS and annotated molecules by METASPACE using NPA. All annotations filtered by organism type, genus, and then hand selected for reasonable ion distribution, resulting in the 13th to 53rd highest ranked an-notations. Optical image of *Streptomyces griseus* subsp *griseus* 40236, *Bacillus subtilis* BGA 618, *Pseudomonas savastanoi* 722, *Streptomyces coelicolor* A2(3) / M145, *Streptomyces lividans* PM66, *Rhodococcus erythropolis* 43066, *Rhodococcus opacus* 43205, *Streptomyces roseililacinus* 40173, *Streptomyces mobaraensis*, *Pseudomonas putida* RW10S2, from left to right, top to bottom. Ion images are arranged from increasing to decreasing MSM score from left to right, top to bottom, while  $m/z$  228 was selected as a background ion image to show the locations of all the bacteria. Each ion image is denoted by the adduct detected, molecule name, the monoisotopic  $m/z$  value, MSM score, and FDR percentage. Molecule names with an \* represent annotations with potential analogs.

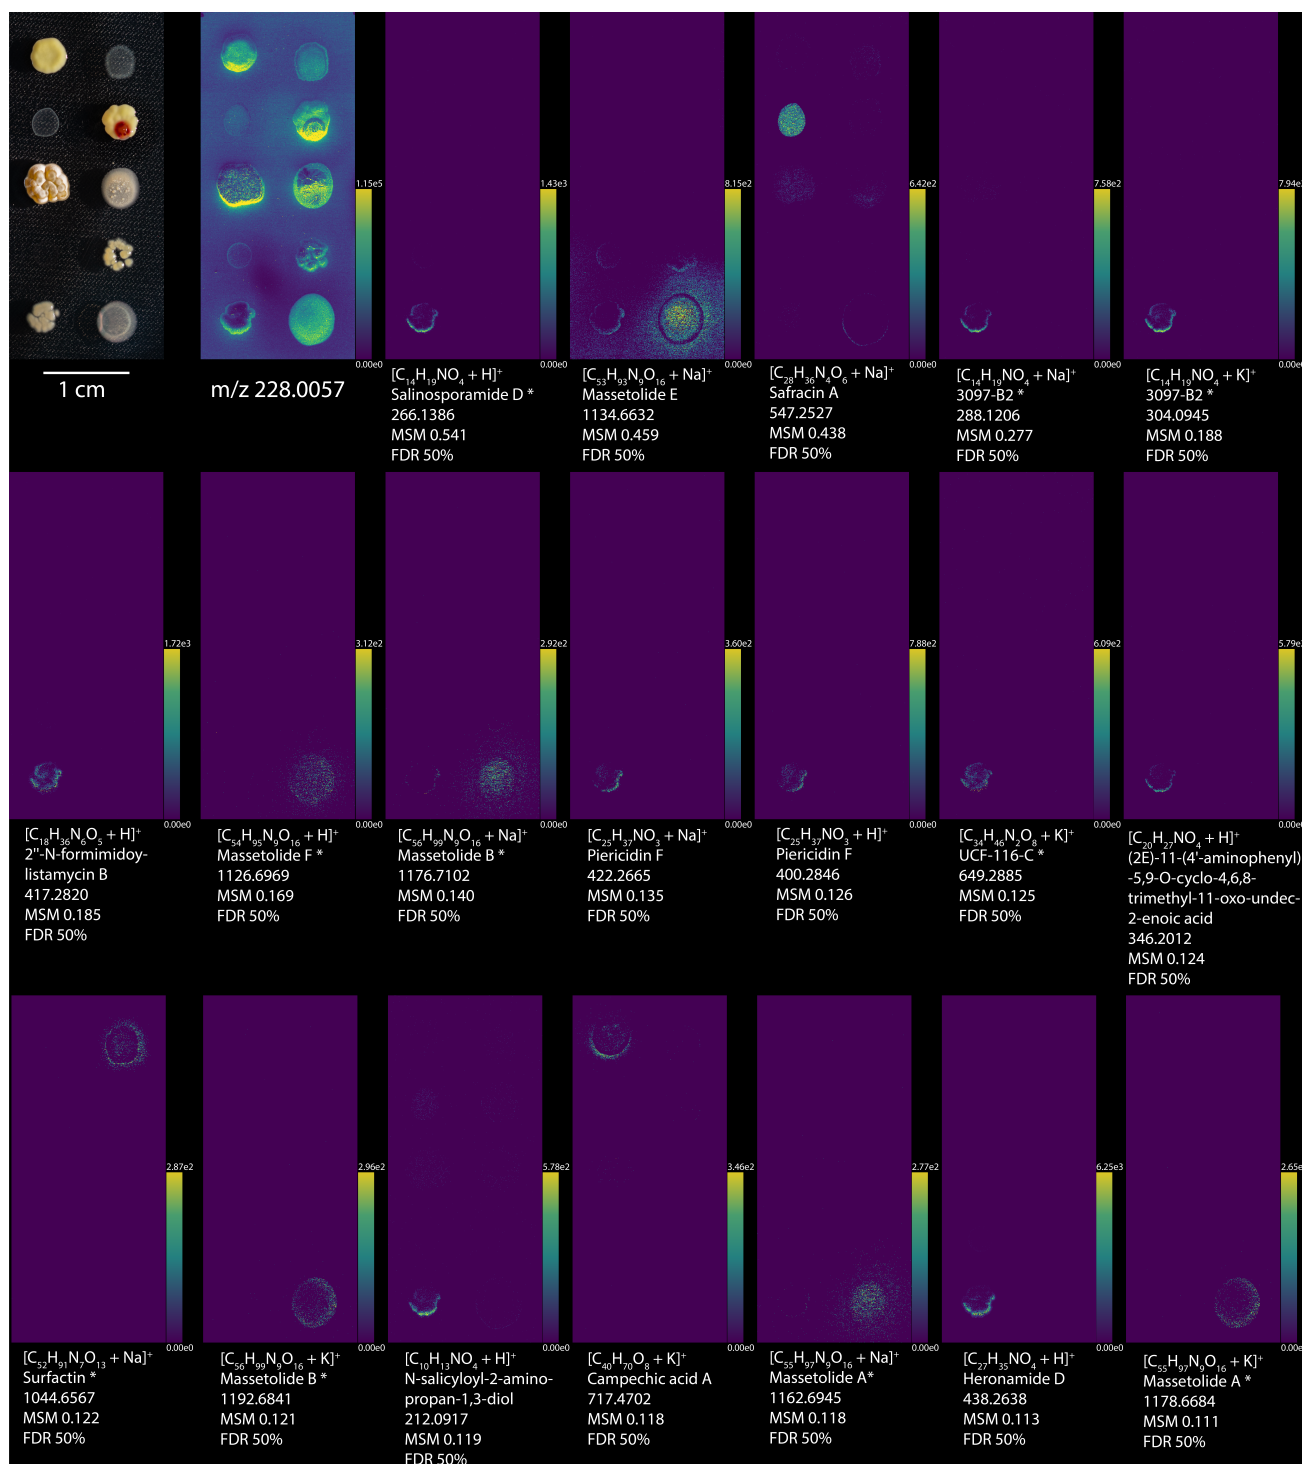

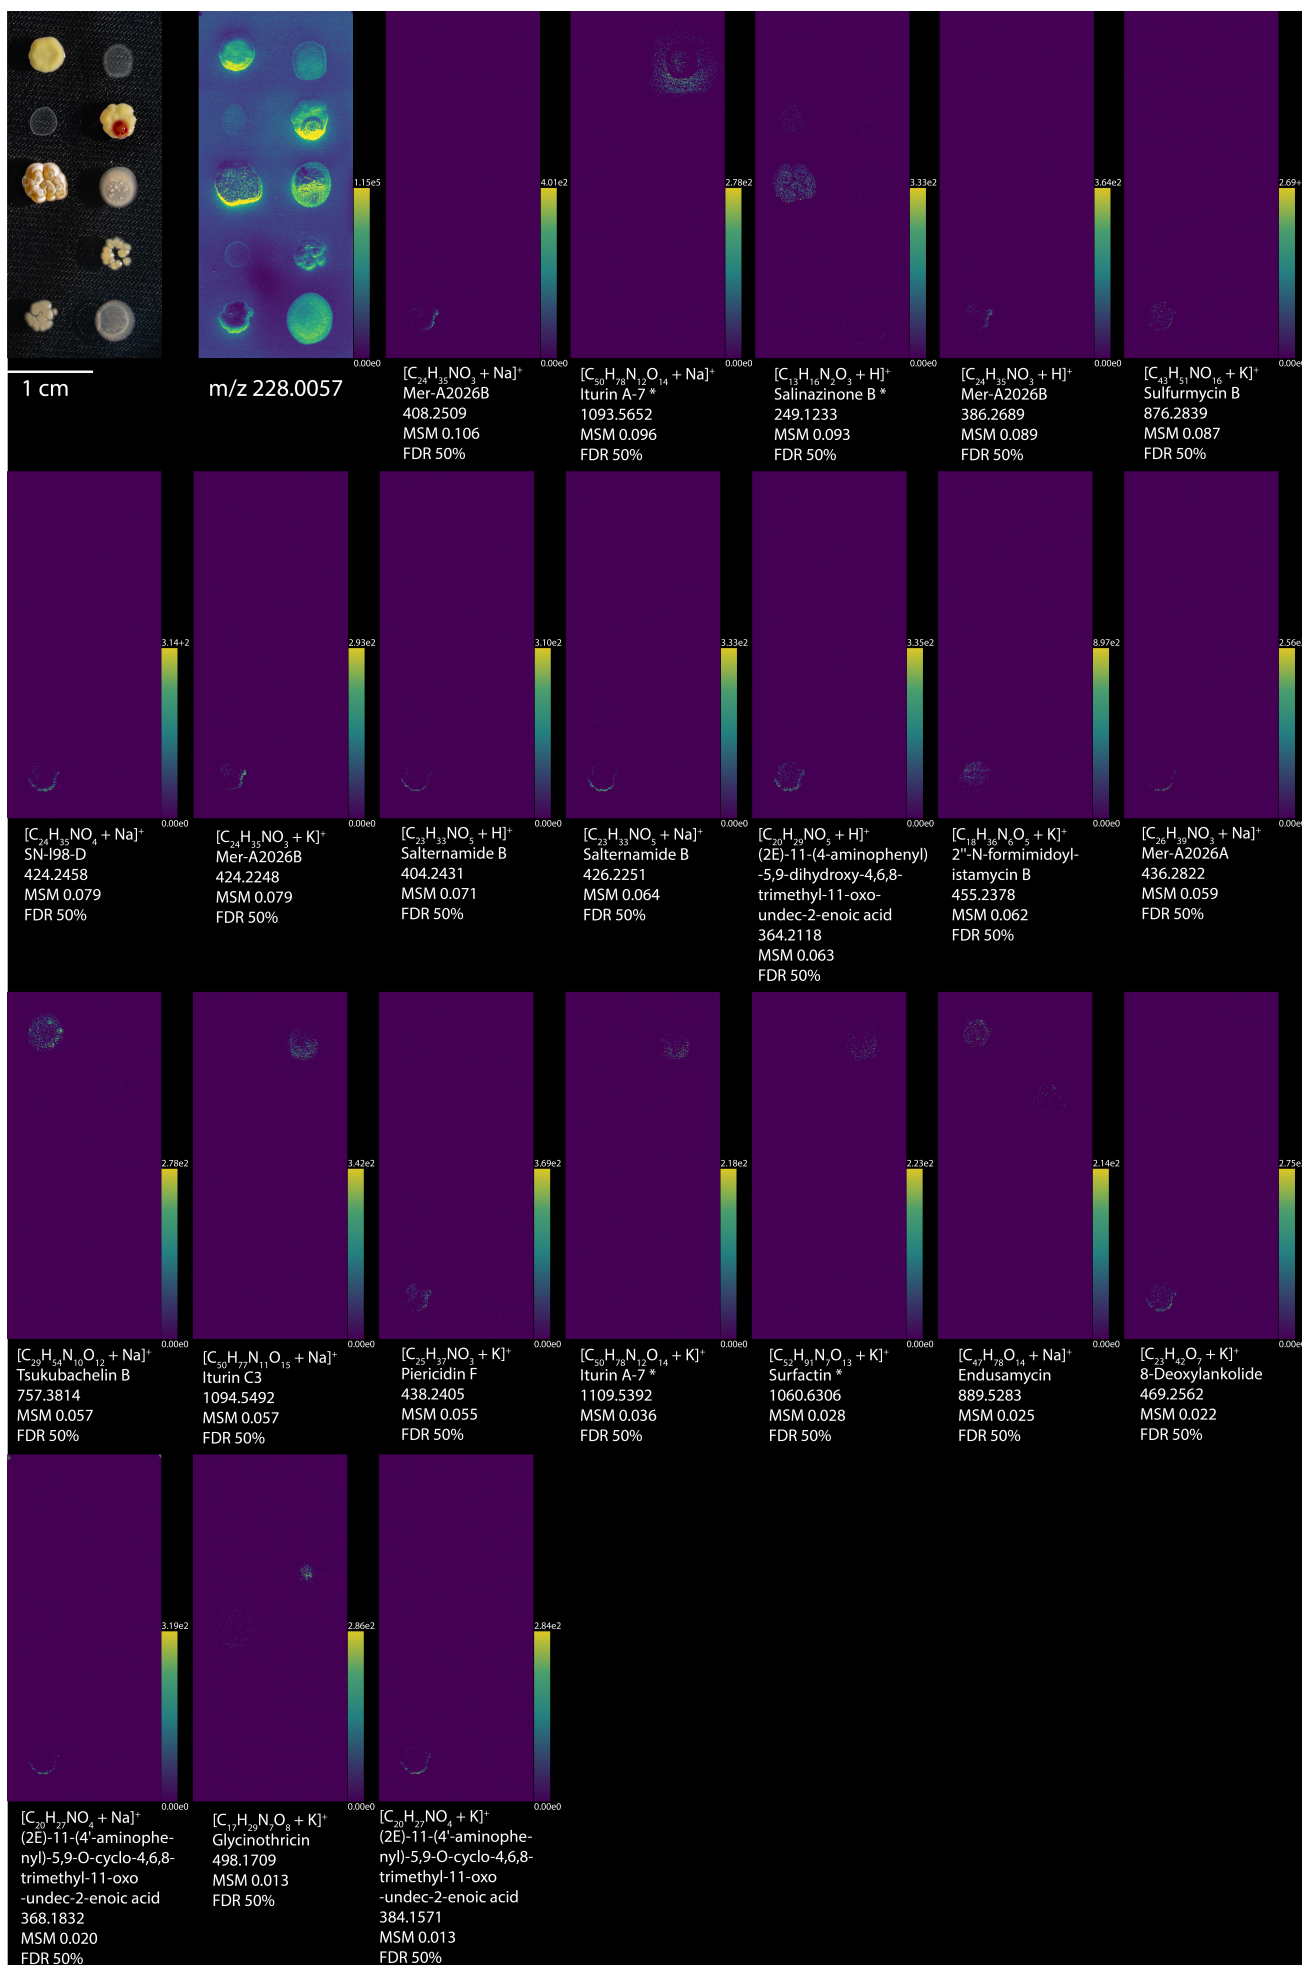

Supplementary Figure S2. Average mass spectrum of the entire imaging area (outlined in pink) including all 10 microbes. The imzML file was loaded into MSiReader (v1.01) and the polygon tool was used to select the region of interest, followed by exporting and viewing the average mass spectrum from the selected pixels.

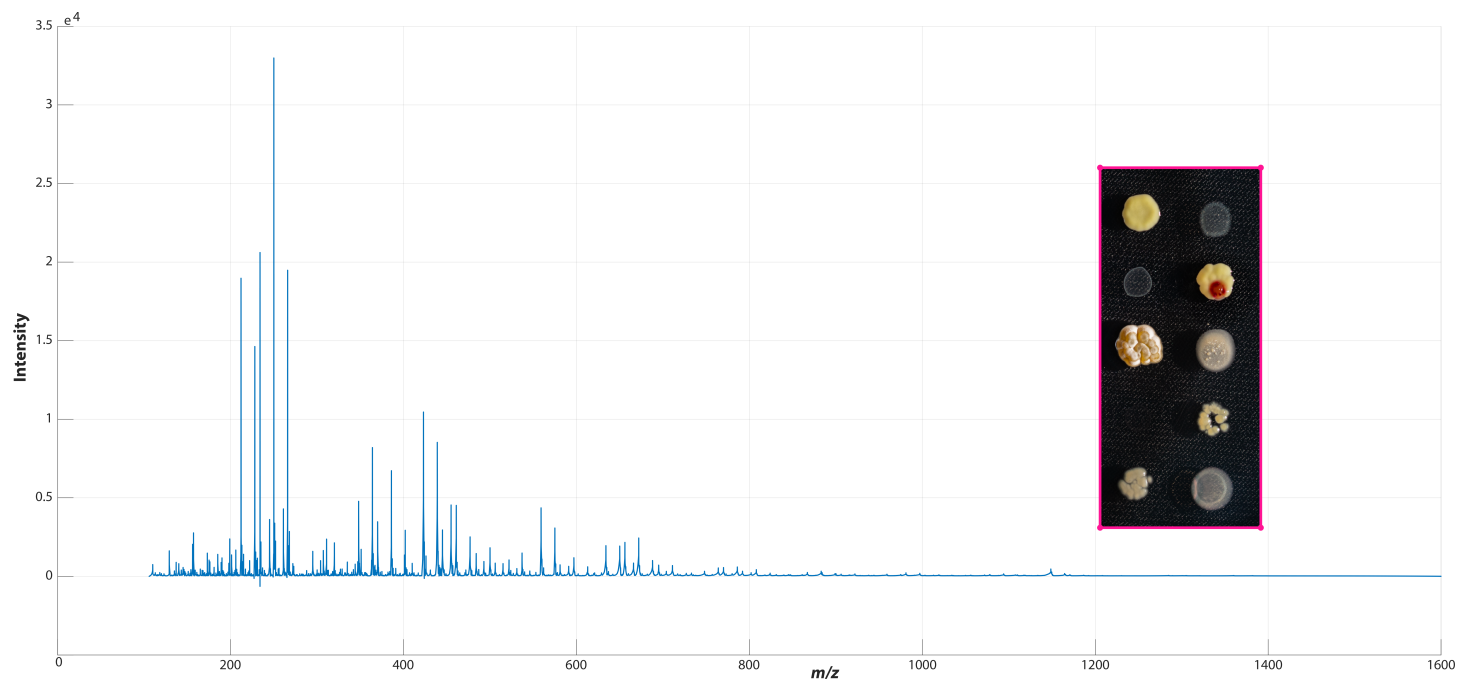

Supplement: s1 [file s1]
